# Supplementary material
Source: publisher figshare collection journal article supplement (https://rs.figshare.com/ndownloader/files/17379692)
Supplement: Supplementary file 1 [file 17379692]

function dy=defor_vis_deltaT(t,y,xi1,xi2,X)

global Ja Jb U P k

dy=zeros(4,1);

k1=interp1(X,xi1,t,'spline');k2=interp1(X,xi2,t,'spline');

%true stress

sigma1=k*Ja*(y(4)^2-y(4)^(-2)*(y(1)/t)^(-2))/(Ja-y(4)^2-(y(1)/t)^2-y(4)^(-2)*(y(1)/t)^(-2)+3)...

+(1-k)*Jb*(y(4)^2*k1^(-2)-k1^2*k2^2*y(4)^(-2)*(y(1)/t)^(-2))/(Jb-y(4)^2*k1^(-2)-(y(1)/t)^2*k2^(-2)-k1^2*k2^2*y(4)^(-2)*(y(1)/t)^(-2)+3)...

-U^2*y(4)^2*(y(1)/t)^2;

sigma2=k*Ja*((y(1)/t)^2-(y(1)/t)^(-2)*y(4)^(-2))/(Ja-y(4)^2-(y(1)/t)^2-y(4)^(-2)*(y(1)/t)^(-2)+3)...

+(1-k)*Jb*((y(1)/t)^2*k2^(-2)-k1^2*k2^2*y(4)^(-2)*(y(1)/t)^(-2))/(Jb-y(4)^2*k1^(-2)-(y(1)/t)^2*k2^(-2)-k1^2*k2^2*y(4)^(-2)*(y(1)/t)^(-2)+3)...

-U^2*y(4)^2*(y(1)/t)^2;

%derivative of nominal stress

s11=k*Ja*(1+3*y(4)^(-4)*(y(1)/t)^(-2))/(Ja-y(4)^2-(y(1)/t)^2-y(4)^(-2)*(y(1)/t)^(-2)+3)...

+2*k*Ja*(y(4)-y(4)^(-3)*(y(1)/t)^(-2))^2/(Ja-y(4)^2-(y(1)/t)^2-y(4)^(-2)*(y(1)/t)^(-2)+3)^2....

+(1-k)*Jb*(k1^(-2)+3*k1^2*k2^2*y(4)^(-4)*(y(1)/t)^(-2))/(Jb-y(4)^2*k1^(-2)-(y(1)/t)^2*k2^(-2)-k1^2*k2^2*y(4)^(-2)*(y(1)/t)^(-2)+3)...

+2*(1-k)*Jb*(y(4)*k1^(-2)-k1^2*k2^2*y(4)^(-3)*(y(1)/t)^(-2))^2/(Jb-y(4)^2*k1^(-2)-(y(1)/t)^2*k2^(-2)-k1^2*k2^2*y(4)^(-2)*(y(1)/t)^(-2)+3)^2....

-U^2*(y(1)/t)^2;

s12=2*k*Ja*y(4)^(-3)*(y(1)/t)^(-3)/(Ja-y(4)^2-(y(1)/t)^2-y(4)^(-2)*(y(1)/t)^(-2)+3)...

+2*k*Ja*(y(4)-y(4)^(-3)*(y(1)/t)^(-2))*((y(1)/t)-y(4)^(-2)*(y(1)/t)^(-3))/(Ja-y(4)^2-(y(1)/t)^2-y(4)^(-2)*(y(1)/t)^(-2)+3)^2....

+2*(1-k)*Jb*k1^2*k2^2*y(4)^(-3)*(y(1)/t)^(-3)/(Jb-y(4)^2*k1^(-2)-(y(1)/t)^2*k2^(-2)-k1^2*k2^2*y(4)^(-2)*(y(1)/t)^(-2)+3)...

+2*(1-k)*Jb*(y(4)*k1^(-2)-k1^2*k2^2*y(4)^(-3)*(y(1)/t)^(-2))*((y(1)/t)*k2^(-2)-k1^2*k2^2*y(4)^(-2)*(y(1)/t)^(-3))/(Jb-y(4)^2*k1^(-2)-(y(1)/t)^2*k2^(-2)-k1^2*k2^2*y(4)^(-2)*(y(1)/t)^(-2)+3)^2....

-2*U^2*y(4)*(y(1)/t);

%governing equations

dy(1)=y(4)*cos(y(3)); %x-coordinate

dy(2)=y(4)*sin(y(3)); % z-coordinate

dy(3)=-sigma2*y(4)*sin(y(3))/sigma1/y(1)+P*y(4)^2*y(1)/sigma1/t; %angle

dy(4)=(t*s11)^(-1)*(sigma2*cos(y(3))*t/y(1)-sigma1/y(4)-s12*(y(4)*cos(y(3))-y(1)/t)); %stretch

end
